# Supplementary material for: Facile and mild preparation of brookite-rutile heterophase-junction TiO2 with high photocatalytic activity based on a deep eutectic solvent (DES)
Source: Royal Society of Chemistry journal article supplement (doi:10.1039/c9ta02500f), 2019-01-01
Supplement: c9ta02500f1.pdf [file c9ta02500f1.pdf]

## Supporting Information

### **Facile and mild preparation of brookite-rutile heterophase junction TiO<sub>2</sub> with high photocatalytic activity based on deep eutectic solvent (DES)**

Qian Wang,<sup>\*‡</sup> Huaiyan Ren,<sup>‡</sup> Yingqiang Zhao, Xinyuan Xia, Fang Huang, Guanwei  
Cui, Bohui Dong and Bo Tang\*

College of Chemistry, Chemical Engineering and Materials Science, Collaborative  
Innovation Center of Functionalized Probes for Chemical Imaging in Universities of  
Shandong, Key Laboratory of Molecular and Nano Probes, Ministry of Education,  
Shandong Provincial Key Laboratory of Clean Production of Fine Chemicals,  
Shandong Normal University, Jinan, Shandong, 250014, PR China. \*E-Mail:  
wangqian@sdu.edu.cn; tangb@sdu.edu.cn.

<sup>‡</sup> These authors contributed equally.

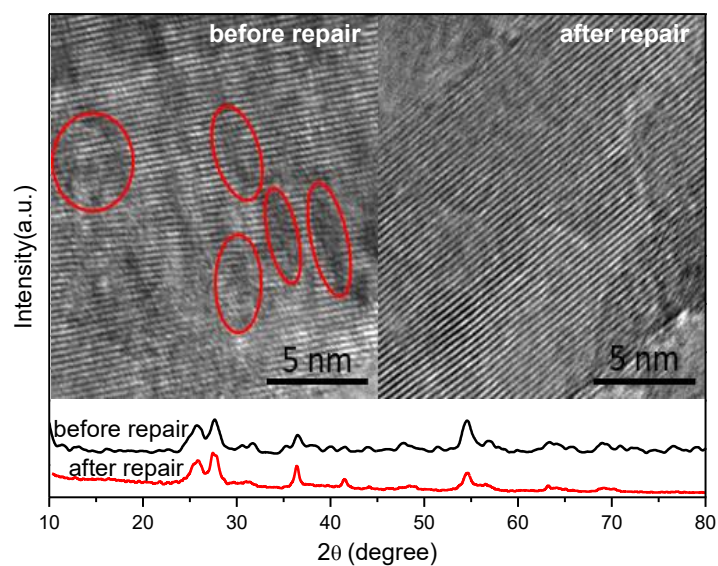

Fig.S1. Contrasts of XRD patterns and HRTEM images before and after repairing defects.

To provide more data to further confirm the effect of defects on the activity, we also repaired the defects of  $\text{TiO}_2$  sample synthesized at 2:1 molar ratio of  $\text{ChCl}$  to retain, and contrasted the XRD patterns, HRTEM images and the photocatalytic activities of the synthesized  $\text{TiO}_2$  before and after repairing defects. It can be seen from Fig.S1† that the results of XRD patterns and HRTEM images are consistent with that of  $\text{TiO}_2$  synthesized with 1:6 molar ratios of  $\text{ChCl}$  to retain. And the photocatalytic activity after defect repairing is  $9.48 \text{ mmol} \cdot \text{h}^{-1} \cdot \text{g}^{-1}$ , which is obviously lower than that before repairing ( $14.51 \text{ mmol} \cdot \text{h}^{-1} \cdot \text{g}^{-1}$ ). This also illustrates that the defects resulted from lattice disorder are indeed helpful for improving the photocatalytic activity.
